# Supplementary material for: Mathematics Anxiety and Self-Efficacy of Mexican Engineering Students: Is There Gender Gap?
Source: MDPI journal article supplement (doi:10.3390/educsci12060391), 2022-06-07
Supplement: s1 [file s1]

**Table S1.** Spanish language final version of the math self-efficacy and math anxiety survey adaptation.

| Math Self-Efficacy Items |                                                                                                                                                |
|--------------------------|------------------------------------------------------------------------------------------------------------------------------------------------|
| 1                        | Simplifique la expresión y elimine cualquier exponente negativo: $Z^{22} \left(\frac{x^3}{y}\right)^{-3} \left(\frac{x^7 y^5}{z^2}\right)^9$   |
| 2                        | Encuentre los valores de a que satisfaga la ecuación: $a^2 = -(11a + 30)$                                                                      |
| 3                        | Encuentre el dominio de la función: $f(x) = 9x^3 + 3x^2 + 10x + 3$                                                                             |
| 4                        | Encuentre el valor de x, tomando en cuenta que a = 57, c = 38 y B = $31^\circ$ y sabiendo que la figura NO es un triángulo rectángulo          |
|                          | 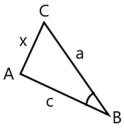                                                            |
| 5                        | Factorice la siguiente expresión: $x^2 - 2x - 35$                                                                                              |
| 6                        | Evalúe la expresión $\log_3 81 = x$                                                                                                            |
| 7                        | Encontrar la derivada de: $f(x) = 9x^3 + \sin x^2 - 3e^{3x} + 4$                                                                               |
| 8                        | Racionalice el denominador: $\sqrt{\frac{9}{12}}$                                                                                              |
| 9                        | Resolver: $\int 3x^5 - 2x \, dx$                                                                                                               |
| 10                       | Determinar cuántos intereses vas a tener que pagar en un préstamo de \$1855 después de un año a una tasa de interés del 12.5% anual.           |
| 11                       | Determinar cuánta madera necesitarás para construir un librero de 1mt. de ancho y 2mt. de alto.                                                |
| 12                       | Determinar cuántos mts <sup>2</sup> de tela tienes que comprar para hacer unas cortinas para la sala de tu casa.                               |
| 13                       | Calcular cuánto pagaste de IVA (16%) si compraste una chamarra nueva en 1350 pesos.                                                            |
| 14                       | Determinar cuánto te toca dejar de propina al dividir una cuenta en 8 partes iguales.                                                          |
| 15                       | Calcular el tiempo que vas a tardar en viajar de una ciudad "A" a una ciudad "B" si viajas a 95 km/h.                                          |
| 16                       | Calcular los kilómetros que puede recorrer tu coche con un tanque de gasolina de 40 lts.                                                       |
| 17                       | Determinar el total de los gastos (comida, renta, traslados, etc.) que necesitas cubrir en un mes.                                             |
| 18                       | Determinar la cantidad de ingredientes que se necesitan para preparar una cena para 41 personas cuando la receta original es para 12 personas. |
| 19                       | Cálculo Diferencial                                                                                                                            |
| 20                       | Cálculo Integral                                                                                                                               |
| 21                       | Lectura y Redacción                                                                                                                            |
| 22                       | Filosofía                                                                                                                                      |
| 23                       | Administración                                                                                                                                 |
| 24                       | Trigonometría                                                                                                                                  |
| Math Anxiety Items       |                                                                                                                                                |
| 25                       | Presentar un examen final de matemáticas.                                                                                                      |
| 26                       | Pensar en una prueba de matemáticas que será la siguiente semana.                                                                              |
| 27                       | Pensar en una prueba de matemáticas que será el día siguiente.                                                                                 |
| 28                       | Pensar en una prueba de matemáticas que será en una hora.                                                                                      |
| 29                       | Esperando recibir tus calificaciones finales de un curso de matemáticas.                                                                       |
| 30                       | Enterarte que necesitas pasar 5 clases de matemáticas para poder graduarte.                                                                    |
| 31                       | Tener un examen sorpresa en clase de matemáticas.                                                                                              |
| 32                       | Trabajar con el libro de texto para realizar una tarea de matemáticas.                                                                         |
| 33                       | Hacer una división de un número de 5 dígitos entre un número de 2 dígitos a mano.                                                              |
| 34                       | Al sumar $976 + 777$ sin poder usar una calculadora.                                                                                           |
| 35                       | Calculando cuanto vas a ahorrar al comprar un artículo con el 16% de descuento.                                                                |
| 36                       | Calculando el total de una cuenta en un restaurante donde crees que te están cobrando de más.                                                  |
| 37                       | Ser responsable de juntar las cuotas de alguna organización y llevar el balance de sus operaciones.                                            |
| 38                       | Realizar varias operaciones aritméticas (multiplicaciones y divisiones) sin ayuda de la calculadora.                                           |
